# Supplementary material for: Impact of smoking cessation on non-alcoholic fatty liver disease prevalence: a systematic review and meta-analysis
Source: HighWire-hosted journal article supplement (doi:10.1136/bmjopen-2023-074216), 2023-12-01
Supplement: bmjopen-2023-074216supp006_data_supplement.pdf [file bmjopen-2023-074216supp006_data_supplement.pdf]

## Female

Evstifeeva 2022

**Random effects model**

Heterogeneity: not applicable

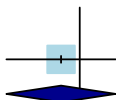

0.92 [0.72; 1.17]

**0.92 [0.72; 1.17]**

## Male

Evstifeeva 2022

Zhou 2019

Liu 2017

Hou 2011

**Random effects model**

Heterogeneity:  $I^2 = 57.01\%$

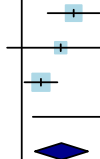

1.26 [1.12; 1.41]

1.19 [0.94; 1.50]

1.09 [1.01; 1.17]

1.55 [1.05; 2.28]

**1.19 [1.06; 1.34]**

0.5 1 2 3

Test for subgroup differences:  $p = 0.06$
